# Supplementary material for: Progesterone Induces Apoptosis and Steroidogenesis in Porcine Placental Trophoblasts
Source: MDPI journal article supplement (doi:10.3390/ani12192704), 2022-10-08
Supplement: s1 [file s1]

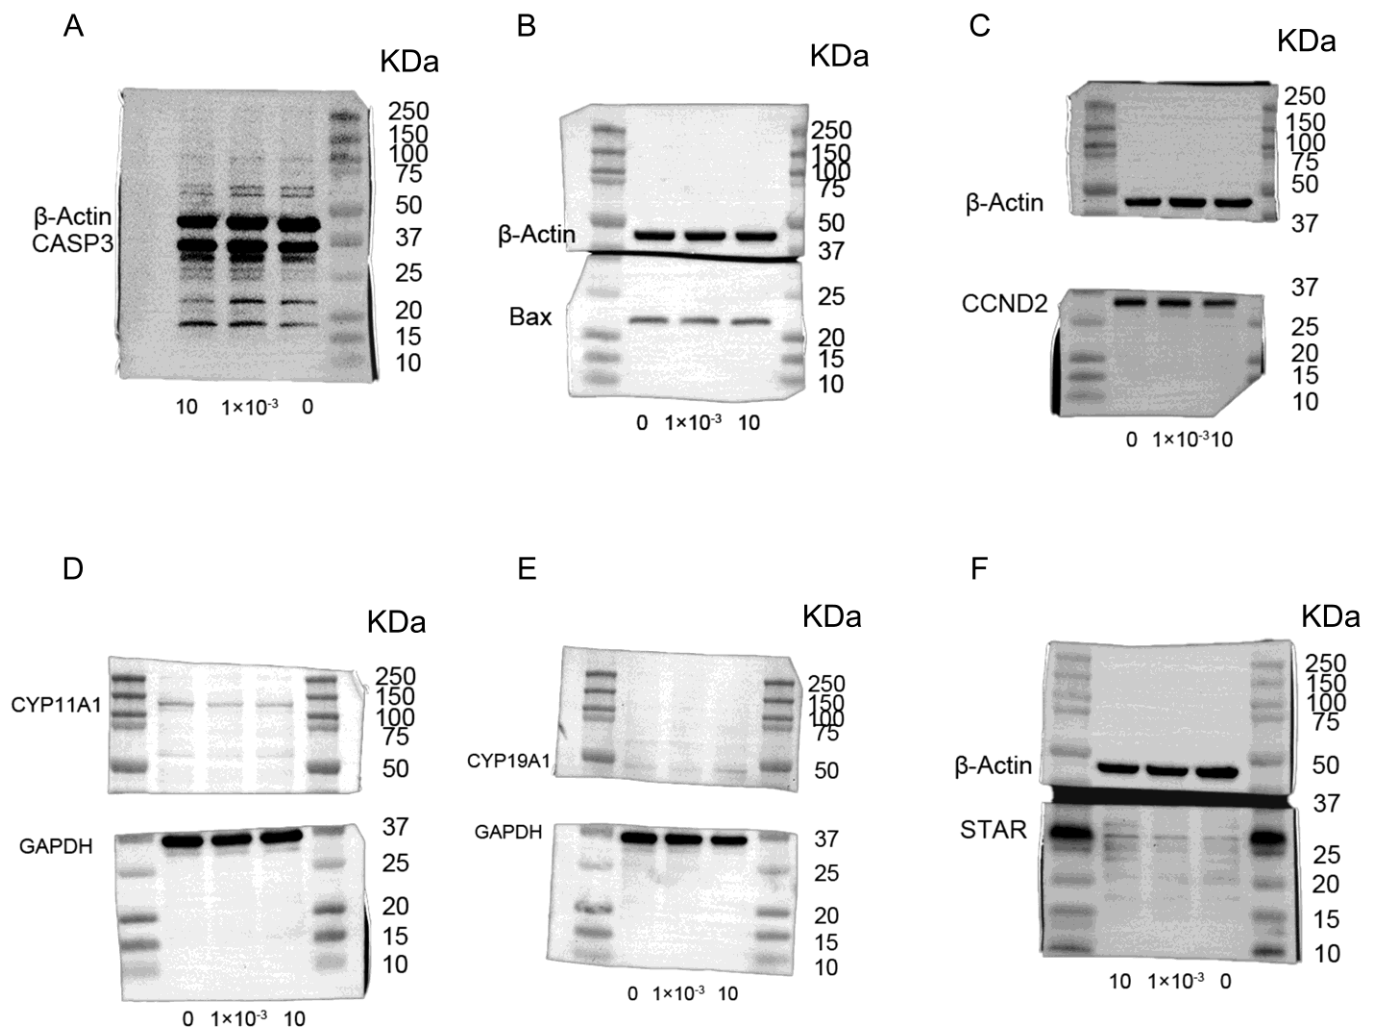

**Figure S1.** Effect of P4 on protein abundance of CASP3 (A), Bax (B), CCND2 (C), CYP11A1 (D), CYP19A1 (E), and StAR (F) in pTr cells after 48 h treatment.
