# Supplementary material for: Progesterone Induces Apoptosis and Steroidogenesis in Porcine Placental Trophoblasts
Source: MDPI journal article supplement (doi:10.3390/ani12192704), 2022-10-08
Supplement: s1 [file s1]

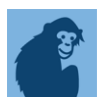

**Table S1.** The intensity ratio of bands in Western blot experiments.

| Treatment                                | Band intensity |                                 | Intensity ratio                       | Protein abundance |
|------------------------------------------|----------------|---------------------------------|---------------------------------------|-------------------|
|                                          | <b>CASP3</b>   | <b><math>\beta</math>-Actin</b> | <b>CASP3/<math>\beta</math>-Actin</b> |                   |
| Control                                  | 341270         | 443888                          | 0.77                                  | 1.00              |
| P4 (1 $\times$ 10 <sup>-3</sup> $\mu$ M) | 404782         | 422473                          | 0.96                                  | 1.25              |
| P4 (10 $\mu$ M)                          | 399211         | 394300                          | 1.01                                  | 1.32              |
|                                          | <b>BAX</b>     | <b><math>\beta</math>-Actin</b> | <b>BAX/<math>\beta</math>-Actin</b>   |                   |
| Control                                  | 124535         | 328084                          | 0.38                                  | 1.00              |
| P4 (1 $\times$ 10 <sup>-3</sup> $\mu$ M) | 95207          | 357027                          | 0.27                                  | 0.70              |
| P4 (10 $\mu$ M)                          | 143740         | 342786                          | 0.42                                  | 1.10              |
|                                          | <b>CCND2</b>   | <b><math>\beta</math>-Actin</b> | <b>CCND2/<math>\beta</math>-Actin</b> |                   |
| Control                                  | 222318         | 312558                          | 0.71                                  | 1.00              |
| P4 (1 $\times$ 10 <sup>-3</sup> $\mu$ M) | 218436         | 354039                          | 0.62                                  | 0.87              |
| P4 (10 $\mu$ M)                          | 150739         | 336999                          | 0.45                                  | 0.63              |
|                                          | <b>CYP11A1</b> | <b>GAPDH</b>                    | <b>CYP11A1/GAPDH</b>                  |                   |
| Control                                  | 22345          | 351696                          | 0.06                                  | 1.00              |
| P4 (1 $\times$ 10 <sup>-3</sup> $\mu$ M) | 15654          | 325300                          | 0.05                                  | 0.76              |
| P4 (10 $\mu$ M)                          | 25199          | 348850                          | 0.07                                  | 1.14              |
|                                          | <b>CYP19A1</b> | <b>GAPDH</b>                    | <b>CYP19A1/GAPDH</b>                  |                   |
| Control                                  | 24644          | 380156                          | 0.06                                  | 1.00              |
| P4 (1 $\times$ 10 <sup>-3</sup> $\mu$ M) | 21838          | 358194                          | 0.06                                  | 0.94              |
| P4 (10 $\mu$ M)                          | 33146          | 311988                          | 0.11                                  | 1.64              |
|                                          | <b>StAR</b>    | <b><math>\beta</math>-Actin</b> | <b>StAR/<math>\beta</math>-Actin</b>  |                   |
| Control                                  | 23793          | 344203                          | 0.07                                  | 1.00              |
| P4 (1 $\times$ 10 <sup>-3</sup> $\mu$ M) | 27193          | 287971                          | 0.09                                  | 1.37              |
| P4 (10 $\mu$ M)                          | 41507          | 285052                          | 0.15                                  | 2.11              |
